# Supplementary material
Source: MDPI journal article supplement (https://www.mdpi.com/2071-1050/12/11/4600)
Supplement: s1 [file s1]

**Supplementary File S1.** Perennial species (recorded in 18 sampling sites of 500 m<sup>2</sup>) of seasonally dry tropical forests and traditional agroforestry systems (also called “Apances”) of the Cañada Oaxaqueña region. Species endemic to Mexico (\*), endemic to the states of Oaxaca and Puebla (\*\*), endemic to Tehuacán-Cuicatlán Valley (\*\*\*), micro-endemic to the Cañada Oaxaqueña (\*\*\*\*), endemic species maintained within the *Apances* (+), species considered rare in the region because it is recorded in only one site (1), a new record for Oaxaca (!), cultivated species (C). Growth Form (GF): Tree (T), shrub (s), liana (li), rosetophyllous (ro), tree or shrub (Ts), shrub or small tree (sT). Contributions: material (M), nonmaterial (N), regulating (R). Risk status: NOM-059-SEMARNAT-2010 (NOM): Subject to Special Protection (SP); IUCN Red List (IUCN): Least Concern (LC), Near Threatened (NT), Population Trend: Stable (S), Decreasing (D).

| GF | Family          | Species                                               | Local name      | Contributions | Risk status |
|----|-----------------|-------------------------------------------------------|-----------------|---------------|-------------|
| s  | Acanthaceae     | <i>Anisacanthus quadrifidus</i>                       |                 |               |             |
| s  |                 | <i>Justicia candicans</i>                             |                 |               |             |
| s  |                 | <i>Ruellia hirsutoglandulosa</i> *+                   |                 |               |             |
| s  |                 | <i>Tetramerium glandulosum</i> *                      |                 |               |             |
| s  | Achatocarpaceae | <i>Phaulothamnus spinescens</i> !                     |                 | M             |             |
| T  | Anacardiaceae   | <i>Cyrtocarpa procera</i> *                           | Chupandía       | M             |             |
| T  |                 | <i>Mangifera indica</i> <sup>c</sup>                  | Mango           | M             |             |
| T  |                 | <i>Spondias purpurea</i>                              | Ciruelo         | M             |             |
| T  | Annonaceae      | <i>Annona reticulata</i> <sup>c</sup>                 | Anona, Anono    | M             |             |
| T  | Apocynaceae     | <i>Cascabela thevetia</i>                             | Venenillo       | M, R          |             |
| li |                 | <i>Marsdenia</i> sp.                                  |                 |               |             |
| T  |                 | <i>Plumeria rubra</i>                                 | Cacaloxóchitl   | N             |             |
| sT | Asparagaceae    | <i>Vallesia glabra</i>                                | Chinto borrego  | M             |             |
| ro |                 | <i>Agave angustifolia</i>                             | Espadín, Maguey | M, R          |             |
| ro |                 | <i>Agave macroacantha</i> ***                         | Maguey          | M, R          |             |
| ro |                 | <i>Agave quiotepecensis</i> ****+                     | Rabo de león    | M, R          |             |
| ro |                 | <i>Agave seemanniana</i>                              | Mano de león    | M, R          |             |
| s  | Asteraceae      | <i>Parthenium tomentosum</i> var. <i>tomentosum</i> * |                 |               |             |
| s  |                 | <i>Viguiera dentata</i>                               | Chimalacate     | R             |             |
| s  | Bignoniaceae    | <i>Tecoma stans</i>                                   | Tronadora       | N             |             |
| Ts | Boraginaceae    | <i>Borreria obovata</i> **1+                          | Zapotillo       | M             |             |

|    |              |                                                        |                               |      |              |
|----|--------------|--------------------------------------------------------|-------------------------------|------|--------------|
| s  |              | <i>Heliotropium ternatum</i>                           | Hierba del alacrán            | M    |              |
| s  |              | <i>Varronia curassavica</i>                            |                               |      |              |
| s  |              | <i>Varronia oaxacana</i> *+                            |                               |      |              |
| ro | Bromeliaceae | <i>Hechtia aff. aquamarina</i> ***                     | Lechuguilla                   | R    |              |
| ro |              | <i>Hechtia aff. fragilis</i> ***                       | Lechuguilla                   | R    |              |
| T  | Burseraceae  | <i>Bursera aptera</i> *+                               | Brea, Cuajote amarillo        | M, N |              |
| T  |              | <i>Bursera fagaroides</i>                              | Cuajote verde / blanco        | M    |              |
| T  |              | <i>Bursera graveolens</i>                              | Aceitillo                     | M    |              |
| T  |              | <i>Bursera linanoe</i> *+                              | Inanoe, Linaloe               | M, N |              |
| T  |              | <i>Bursera morelensis</i> *+                           | Mulato, Cuajote colorado      | M    |              |
| sT |              | <i>Bursera schlechtendalii</i>                         | Aceitillo, Cuajote colorado   | M    |              |
| T  |              | <i>Bursera submoniliformis</i> *+                      | Copalillo, Copal de alebrije  | M, N |              |
| s  | Cactaceae    | <i>Acanthocereus subinermis</i> *+                     | Nopal de cruz                 | M, R |              |
| s  |              | <i>Coryphantha calipensis</i> ***+                     | Biznaga, Chilillos, Chilitos  | M, N |              |
| Ts |              | <i>Escontria chiotilla</i> *+                          | Jiotilla, Quiotilla, Xonostle | M    | IUCN (LC; S) |
| s  |              | <i>Ferocactus latispinus</i> var. <i>spiralis</i> ***+ | Biznaga                       | M, N | IUCN (LC; S) |
| Ts |              | <i>Lophocereus marginatus</i> *+                       | Órgano                        | M    |              |
| s  |              | <i>Mammillaria carnea</i> **+                          | Biznaga, Chilitos             | M    | IUCN (LC; D) |
| Ts |              | <i>Myrtillocactus geometrizans</i> *+                  | Padrenuestro, Garambullo      | M    | IUCN (LC; S) |
| T  |              | <i>Neobuxbaumia tetetzo</i> var. <i>tetetzo</i> ***+   | Tetecho                       | M    | IUCN (LC; S) |
| s  |              | <i>Opuntia decumbens</i>                               | Cocoche loco, Nopal           | R    |              |
| s  |              | <i>Opuntia depressa</i> *+                             | Cocoche, Nopal                | M    | IUCN (LC; S) |
| Ts |              | <i>Opuntia pilifera</i> *+                             | Cocoche, Nopal                | M    | IUCN (LC; S) |
| s  |              | <i>Opuntia pubescens</i>                               | Chile de perro                | R    |              |
| Ts |              | <i>Opuntia velutina</i> *                              | Cocoche                       | M    |              |
| s  |              | <i>Opuntia aff. tehuacana</i> ***                      | Cocoche loco, Nopal           | R    |              |
| T  |              | <i>Pachycereus weberi</i> *+                           | Cardón                        | M    | IUCN (LC; D) |
| Ts |              | <i>Pilosocereus chrysacanthus</i> **                   | Barba de viejo, Nanabuela     | M    | IUCN (LC; S) |
| Ts |              | <i>Stenocereus pruinosus</i> **+                       | Pitayo                        | M    | IUCN (LC; S) |

|    |                 |                                         |                         |      |              |
|----|-----------------|-----------------------------------------|-------------------------|------|--------------|
| Ts |                 | <i>Stenocereus stellatus</i> *+         | Tunillo, Tuna           | M    | IUCN (LC; S) |
| s  | Cannabaceae     | <i>Celtis pallida</i>                   | Rompezallo              | M    |              |
| T  | Capparaceae     | <i>Quadrella incana</i>                 | Matagallina             | M    |              |
| s  | Celastraceae    | <i>Schaefferia stenophylla</i> **1      |                         | M    |              |
| li |                 | <i>Semialarium mexicanum</i>            |                         |      |              |
| s  | Convolvulaceae  | <i>Ipomoea pauciflora</i>               |                         | M    |              |
| li | Cucurbitaceae   | <i>Doyerea emetocathartica</i>          | Bejuco                  |      |              |
| sT | Erythroxylaceae | <i>Erythroxylum rotundifolium</i>       |                         | M    |              |
| sT | Euphorbiaceae   | <i>Adelia oaxacana</i> *+               |                         | M    |              |
| sT |                 | <i>Cnidoscolus tubulosus</i>            | Mala mujer              | M    |              |
| s  |                 | <i>Croton alamosanus</i> *+             |                         |      |              |
| s  |                 | <i>Croton mazapensis</i>                | Nanche                  |      |              |
| s  |                 | <i>Croton sonarae</i> *+                |                         |      |              |
| Ts |                 | <i>Euphorbia schlechtendalii</i>        | Cuajote colorado / rojo | M    |              |
| s  |                 | <i>Euphorbia tithymaloides</i>          | Cordobán, Zapatitos     | M    |              |
| sT |                 | <i>Jatropha neopauciflora</i> ***       | Sangre de grado         | M    |              |
| Ts |                 | <i>Sebastiania pavoniana</i>            | Chilillo                | M    |              |
| T  | Fabaceae        | <i>Vachellia campeachiana</i> *+        | Cucharo, Cucharito      | M    |              |
| s  |                 | <i>Vachellia farnesiana</i>             | Huizache                | M    |              |
| T  |                 | <i>Vachellia pringlei</i> *1            | Quebracho, Quiebracha   | M    |              |
| s  |                 | <i>Aeschynomene compacta</i>            |                         |      |              |
| Ts |                 | <i>Coursetia glandulosa</i> *+          |                         | M    |              |
| s  |                 | <i>Dalea carthagenensis</i>             | Escobillo               | M    |              |
| T  |                 | <i>Erythrina americana</i> <sup>c</sup> | Pipe                    | M    |              |
| T  |                 | <i>Leucaena leucocephala</i>            | Guaje, Cacique          | M    |              |
| T  |                 | <i>Lysiloma divaricatum</i>             | Guajillo                | M    |              |
| T  |                 | <i>Mariosousa coulteri</i> *+           | Guapinole               | M, R |              |
| s  |                 | <i>Mimosa lactiflua</i> *               | Uña de gato             | M    |              |
| sT |                 | <i>Mimosa luisana</i> ***+              | Uña de gato             | M    |              |

|      |                   |                                     |                             |      |          |
|------|-------------------|-------------------------------------|-----------------------------|------|----------|
| s    |                   | <i>Mimosa polyantha*</i>            | Rabo de iguana              | M    |          |
| T    |                   | <i>Parkinsonia praecox</i>          | Mantecoso                   | M, R |          |
| T    |                   | <i>Pithecellobium dulce</i>         | Guamúchil                   | M, R |          |
| T    |                   | <i>Prosopis laevigata</i>           | Mezquite                    | M, R |          |
| T    |                   | <i>Senna atomaria</i>               | Oaxaqueño, Vainillo         | M    |          |
| Ts   |                   | <i>Senna wislizeni</i>              | Novio, Palo hueso, Huesillo | M    |          |
| s    |                   | <i>Tephrosia</i> sp.                |                             |      |          |
| T    | Fouquieriaceae    | <i>Fouquieria formosa*</i>          | Tlapacón                    | M, R |          |
| T    | Hernandiaceae     | <i>Gyrocarpus mocinoi</i>           | Hediondo, Volador           |      |          |
| T    | Julianaceae       | <i>Amphipterygium adstringens</i>   | Cuachalalá                  | M    |          |
| Ts   | Malpighiaceae     | <i>Bunchosia montana</i>            | Nanche                      | M    |          |
| s    |                   | <i>Calicola parvifolia**+</i>       |                             |      |          |
| s-li |                   | <i>Echinopterys eglandulosa*+</i>   |                             |      |          |
| Ts   |                   | <i>Malpighia galeottiana**+</i>     | Maromero                    | M    |          |
| li   |                   | <i>Stigmaphyllon selerianum*</i>    |                             |      |          |
| s    | Malvaceae         | <i>Allowissadula pringlei*</i>      |                             |      |          |
| s    |                   | <i>Ayenia ovata*</i>                |                             |      |          |
| T    |                   | <i>Ceiba parvifolia*+</i>           | Pochote, Pochotle           | M    |          |
| T    |                   | <i>Guazuma ulmifolia</i>            | Caulote                     | M, R |          |
| s    |                   | <i>Melochia tomentosa</i>           | Tapacola                    | M    |          |
| s    |                   | <i>Waltheria indica</i>             |                             |      |          |
| T    | Meliaceae         | <i>Cedrela odorata</i>              | Cedro                       | M    | NOM (SP) |
| T    |                   | <i>Swietenia humilis</i>            | Caoba                       | M    |          |
| T    | Myrtaceae         | <i>Psidium guajava</i> <sup>c</sup> | Guayabo                     | M    |          |
| T    | Opiliaceae        | <i>Agonandra obtusifolia*</i>       |                             |      |          |
| sT   | Plocospermataceae | <i>Plocosperma buxifolium</i>       | Huesito                     | N    |          |
| sT   | Polgygonaceae     | <i>Podopterus mexicanus</i>         | Negrito                     | M    |          |
| T    |                   | <i>Ruprechtia fusca*+</i>           | Guayabillo, Caulotillo      |      |          |
| sT   | Rhamnaceae        | <i>Karwinskia humboldtiana</i>      | Agalán                      | M    |          |

|    |               |                                                      |                              |   |
|----|---------------|------------------------------------------------------|------------------------------|---|
| T  |               | <i>Krugiodendron ferreum</i> <sup>1</sup>            | Palo prieto                  | M |
| Ts |               | <i>Rhamnus</i> sp.                                   |                              |   |
| Ts |               | <i>Ziziphus amole</i> *+                             | Manzanito                    | M |
| Ts |               | <i>Ziziphus pedunculata</i> *+                       | Cholulo                      | M |
| s  | Rubiaceae     | <i>Hamelia patens</i>                                |                              |   |
| T  |               | <i>Hintonia latiflora</i>                            | Garañona                     | M |
| Ts |               | <i>Randia thurberi</i>                               | Vara de cruz, Zapotito       | M |
| sT | Rutaceae      | <i>Zanthoxylum aff. liebmannianum</i> * <sup>1</sup> | Culantrillo                  | M |
| li | Sapindaceae   | <i>Cardiospermum halicacabum</i>                     |                              |   |
| li |               | <i>Serjania racemosa</i>                             | Bejuco                       |   |
| T  | Sapotaceae    | <i>Manilkara zapota</i> <sup>c</sup>                 | Chico, Chicozapote           | M |
| T  |               | <i>Sideroxylon palmeri</i> * <sup>c</sup> +          | Tempesquistle                | M |
| s  |               | <i>Sideroxylon verruculosum</i>                      |                              |   |
| s  | Simaroubaceae | <i>Castela tortuosa</i>                              | Cenizo                       | M |
| sT | Solanaceae    | <i>Cestrum dumetorum</i>                             | Huele de noche               | N |
| s  |               | <i>Datura stramonium</i>                             | Toloache                     |   |
| s  |               | <i>Solanum erianthum</i>                             |                              |   |
| s  |               | <i>Solanum tridynamum</i> *+                         |                              |   |
| s  | Verbenaceae   | <i>Lantana achyranthifolia</i>                       |                              |   |
| s  |               | <i>Lantana camara</i>                                |                              |   |
| s  |               | <i>Lippia bracteosa</i>                              |                              |   |
| s  |               | <i>Lippia graveolens</i>                             | Oreganillo, Orégano cimarrón | M |
| li |               | <i>Petrea volubilis</i>                              | Gorro de nene, Solterito     | N |
| li | Vitaceae      | <i>Cissus trifoliata</i>                             |                              |   |

---
