# Supplementary material
Source: MDPI journal article supplement (https://www.mdpi.com/2071-1050/12/11/4600)
Supplement: s1 [file s1]

**Supplementary File S2.** Semi-structured interview conducted with the peasants who managed the agricultural plots studied.

Name \_\_\_\_\_ Age \_\_\_\_\_ Date \_\_\_\_/\_\_\_\_/\_\_\_\_

Location \_\_\_\_\_ System \_\_\_\_\_

### 1. Agricultural component

What crops do you have in your plots? Corn ( ), beans ( ), lemon ( ), other ( ) \_\_\_\_\_

Do you plant different varieties (types, classes) of the same crop?

(a) Of corn \_\_\_\_\_

(b) Beans \_\_\_\_\_

(c) Lemon \_\_\_\_\_

(d) From others \_\_\_\_\_

+ What is the crop that is most important to you?

+ Why is it important?

Does any crop need fertilizer or manure?

a) Corn, Which one? \_\_\_\_\_

(b) Beans \_\_\_\_\_

(c) Lemon \_\_\_\_\_

(d) Other \_\_\_\_\_

Why do you use compost? \_\_\_\_\_

What pests or diseases have you seen on your crops (or wild plants)?  
\_\_\_\_\_

How do you control them? (product or handling) \_\_\_\_\_

Do you let the earth rest? Yes ( ), No ( ). How long? \_\_\_\_\_

Why?

What machinery or tools do you use for the work (preparing the soil, sowing, ploughing or harvesting)? \_\_\_\_\_

+ Do you burn the vegetation on your plot? Yes ( ), No ( ).

+ Why do you burn the vegetation?

What type of irrigation do you use?

How much do you spend on?

a) Seed \$ \_\_\_\_\_

(b) Subscription \$ \_\_\_\_\_

(c) Joint / tractor \$ \_\_\_\_\_

d) Poisons (insecticides) for pests \$ \_\_\_\_\_

e) Herbicides (weeding) \$ \_\_\_\_\_

f) Journeys (planters) \$ \_\_\_\_\_

Who works on your plot? (family, day labourers, community). In which period?

+ Do you choose (or select) your seed at the end of the agricultural cycle? Yes ( ), No ( ).

+ How do you choose your seed?

+ How do you keep your seed? \_\_\_\_\_

+ What is the destination of your harvest? Sale \$ ( ), Self-consumption ( ), Forage ( ), Other ( ).

What do you use it for?

+ Where did he get his seed from? Bought ( ), Gifted ( ), Owned ( ).

+ If it is your own, how many years have you had it for? \_\_\_\_ Who was it from before?

+ Bought, who did you buy it from? \_\_\_\_\_ Where was the person from?

+ Gifted, Who gave it to you? \_\_\_\_\_ Where was the person from?

+ Have you sold seed? Yes ( ), No ( ).

+ To whom? \_\_\_\_\_ Where was the person from? \_\_\_\_\_

+ Have you given away seed? Yes ( ), No ( ).

+ To whom? \_\_\_\_\_ Where was the person from? \_\_\_\_\_

+ What was the reason for the sale/gift?

+ Lost seed? Yes ( ), No ( ). Which variety? \_\_\_\_\_

+ How many years ago did you lose it? For what reason? \_\_\_\_\_

+ Would you like to get it back? Yes ( ), No ( ). Why? \_\_\_\_\_

## 2. Characteristics of the plot

No. of plots \_\_\_\_\_ Time of use (current owner) \_\_\_\_\_ Total \_\_\_\_\_

Size \_\_\_\_\_ (Ha/plot)

Ownership (ejidal, communal, other) \_\_\_\_\_

Do you have any other productive activity? farmer ( ), goat farmer ( ), trade ( ), services ( ), day labourer ( ), trade ( ), professional ( ), other ( ). \_\_\_\_\_

What has been sown before? Whose was it? \_\_\_\_\_

Particular situations \_\_\_\_\_

### 3. Vegetation management

Do you leave trees on your plot when you open it when you cut it down? Yes ( ), No ( ).

Why? \_\_\_\_\_

Does it make you clear? Yes ( ), No ( ).

What bush plants do you have on your plot?

\_\_\_\_\_

Which plants do you prefer to keep on your plots? (large, healthy, useful, rare)

\_\_\_\_\_

Which plants do you always remove from the plots? (small, sick, in the way, useless, very abundant) \_\_\_\_\_

Which plants do you always remove from the plots? (small, sick, in the way, useless, very abundant) \_\_\_\_\_

Which plants do you think are best left on your plots and why?

1 \_\_\_\_\_ 2 \_\_\_\_\_

3 \_\_\_\_\_ 4 \_\_\_\_\_

5 \_\_\_\_\_ 6 \_\_\_\_\_

7 \_\_\_\_\_ 8 \_\_\_\_\_

9 \_\_\_\_\_ 10 \_\_\_\_\_

### 4. Benefits and contributions

In order of importance from 1 to 10, which groups of plants do you prefer to leave in the plot?

Utility (materials)

a) Those that are edible ( ) Which ones? Why?

(b) Firewood ( ) \_\_\_\_\_

- (c) Fodder or pasture ( ) \_\_\_\_\_
- (d) Fruits ( ) \_\_\_\_\_
- (e) Tools ( ) \_\_\_\_\_
- (f) Medicine ( ) \_\_\_\_\_)
- (g) Timber ( ) \_\_\_\_\_
- (h) Construction ( ) \_\_\_\_\_
- (i) Prepare drinks ( ) \_\_\_\_\_
- (j) Other ( ) \_\_\_\_\_

#### Ecosystem benefits (regulatory)

- a) Those that give shade ( ) Which ones? Why?

\_\_\_\_\_

- (b) They give fertilizer ( ) \_\_\_\_\_
- (c) Retain soil (erosion) ( ) \_\_\_\_\_.
- (d) They infiltrate and control water ( ) \_\_\_\_\_
- (e) Windbreak barriers ( ) \_\_\_\_\_.
- (f) Attract rain ( ) \_\_\_\_\_

#### Crop management

- a) Live fences ( ) Which ones? Why?

\_\_\_\_\_

- (b) Guides ( ) \_\_\_\_\_
- (c) Habitat of other useful species ( ) \_\_\_\_\_
- (d) Shape the terrain ( ) \_\_\_\_\_.
- (e) Other ( ) \_\_\_\_\_

#### Ethical Motivations

- a) They are part of nature ( ) Which ones? Why?

\_\_\_\_\_

- (b) Decorate (luxury, ornamental) ( ) \_\_\_\_\_
- c) Ceremonial / ritual ( ) \_\_\_\_\_
- d) They do not affect / do not disturb ( ) \_\_\_\_\_.

(e) Rules of use ( ) \_\_\_\_\_

How much does your plot of land provide you with the required products to support your family (%)?

For how many months a year do your plots contribute to the family's support?

(a) Corn \_\_\_\_\_

(a) Beans \_\_\_\_\_

(b) Lemon \_\_\_\_\_.

(c) Pumpkin \_\_\_\_\_.

(d) Other (for sale) \_\_\_\_\_

Where do you prefer to keep the vegetation on the plot? (whole plot, edge, center, stripes)

\_\_\_\_\_

Do you move plants from the center to the shore or to other places? Yes ( ), No ( )

Which plants? \_\_\_\_\_

Why? \_\_\_\_\_

Do you plant any particular plants? Yes ( ), No ( )

Which ones? \_\_\_\_\_

Why? \_\_\_\_\_

Do you pay for parts of some plants within the plot? Yes ( ), No ( )

Which ones? \_\_\_\_\_

Why? \_\_\_\_\_

Do you bring plants or plant parts from the hill (arms, seeds, tubers)? Yes ( ), No ( ).

Which ones?

Which parts? \_\_\_\_\_

Why? \_\_\_\_\_

## 5. Decisions on the maintenance of species

(i) Collective rules

Are there rules to avoid cutting down trees when opening the plots? Yes ( ), No ( ).

a) They exist for all plants (adults, juveniles)

b) Only for trees in the bush or cactus

c) Only for particular trees or plants Which ones? \_\_\_\_\_

What are the penalties for cutting down a tree?

a) Warning (scolding)

b) Repair of the damage How? \_\_\_\_\_

c) Fine How much? \_\_\_\_\_

(d) Other \_\_\_\_\_

(ii) Incentives and programmes

Is there a program that promotes the cutting of trees within the plots (e.g. PROCAMPO (PROAGRO), reserve program, other)? Yes ( ), No ( ).

\_\_\_\_\_

Is there a program that promotes reforestation or maintenance of trees on the plots? (community, NGO, researchers, reserve, government, other) Yes ( ), No ( ). \_\_\_\_\_

(iii) Land tenure, plot characteristics and agricultural production

When do you keep more trees in the plot? (when the plot is yours, has many plots, is on flat ground, on large ground, newly opened, very productive)

\_\_\_\_\_

When do you remove more trees in the plot (when the plot is not yours, only has one plot, is on sloping ground, small, very old, gives very little production)

\_\_\_\_\_

Are there trees or plants that affect crops? Yes ( ), No ( ). In what way?

a) They compete for light, water or nutrients. \_\_\_\_\_

b) They directly damage the crops. \_\_\_\_\_

(c) Removing space for sowing \_\_\_\_\_.

(d) Other \_\_\_\_\_

Are there trees or plants that benefit crops? Yes ( ), No ( ).

a) They provide fertilizer, water, shade. \_\_\_\_\_

(b) Other \_\_\_\_\_

What is the best way for you to work the land?

\_\_\_\_\_

What are the main reasons for leaving trees, shrubs or bushes on the plot?

\_\_\_\_\_

Which do you think is better, traditional agriculture (for self-consumption) ( ) or agro-industrial production (to sell, export) ( )? Why?

---

Do you know the term “traditional agroforestry system” (TAFS)? Yes ( ), No ( ).

What are the advantages of the TAFS? \_\_\_\_\_

What are the disadvantages of the TAFS? \_\_\_\_\_

Comments

---

---

---
